# Supplementary material
Source: publisher figshare collection journal article supplement (https://frontiersin.figshare.com/ndownloader/files/15274349)
Supplement: Supplementary file [file 15274349]

## **SUPPLEMENTARY MATERIAL**

### **Stepwise development of an *in vitro* continuous fermentation model for the murine caecal microbiota**

Sophie A. Poeker<sup>1</sup>, Christophe Lacroix<sup>1</sup>, Tomas de Wouters<sup>1</sup>, Marianne R. Spalinger<sup>2</sup>,  
Michael Scharl<sup>2</sup> and Annelies Geirnaert<sup>1\*</sup>

<sup>1</sup> Laboratory of Food Biotechnology, Institute of Food, Nutrition and Health, ETH Zurich, Switzerland.

<sup>2</sup> Division of Gastroenterology and Hepatology, University Hospital Zurich, Zurich, Switzerland.

\* Corresponding author: Annelies Geirnaert, Laboratory of Food Biotechnology, Institute of Food, Nutrition and Health, ETH Zurich, Schmelzbergstrasse 7, 8092 Zürich, Switzerland;  
Phone: +41 44 632 14 03; mail: [annelies.geirnaert@hest.ethz.ch](mailto:annelies.geirnaert@hest.ethz.ch)

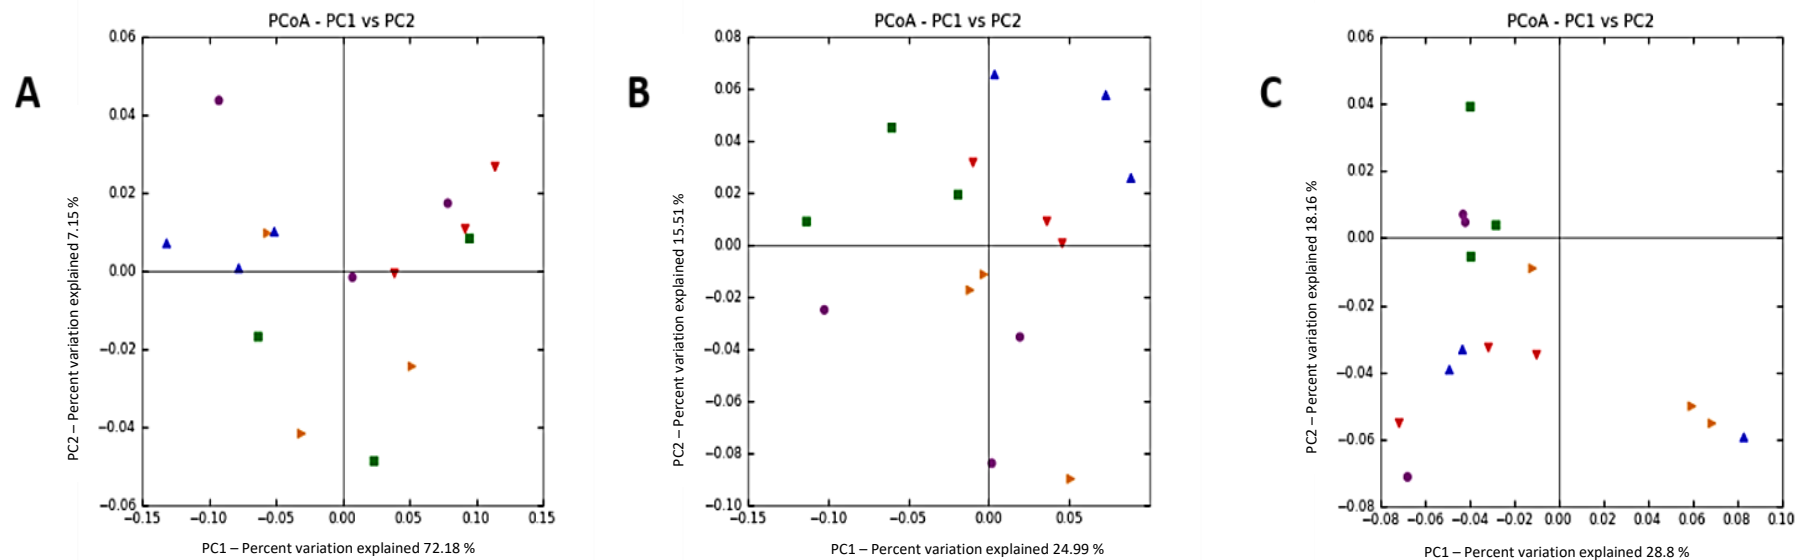

**Supplementary Figure S1:** Individual variations among the caecal murine microbial communities. PCoA showing caecal microbiota from WT C57BL/6 mice housed in different cages based on weighted (A), unweighted (B) and generalized (C) UniFrac distance matrix. N=3 per cage; cage 1: red; cage 2: blue; cage 3: orange; cage 4: green; cage 5: purple

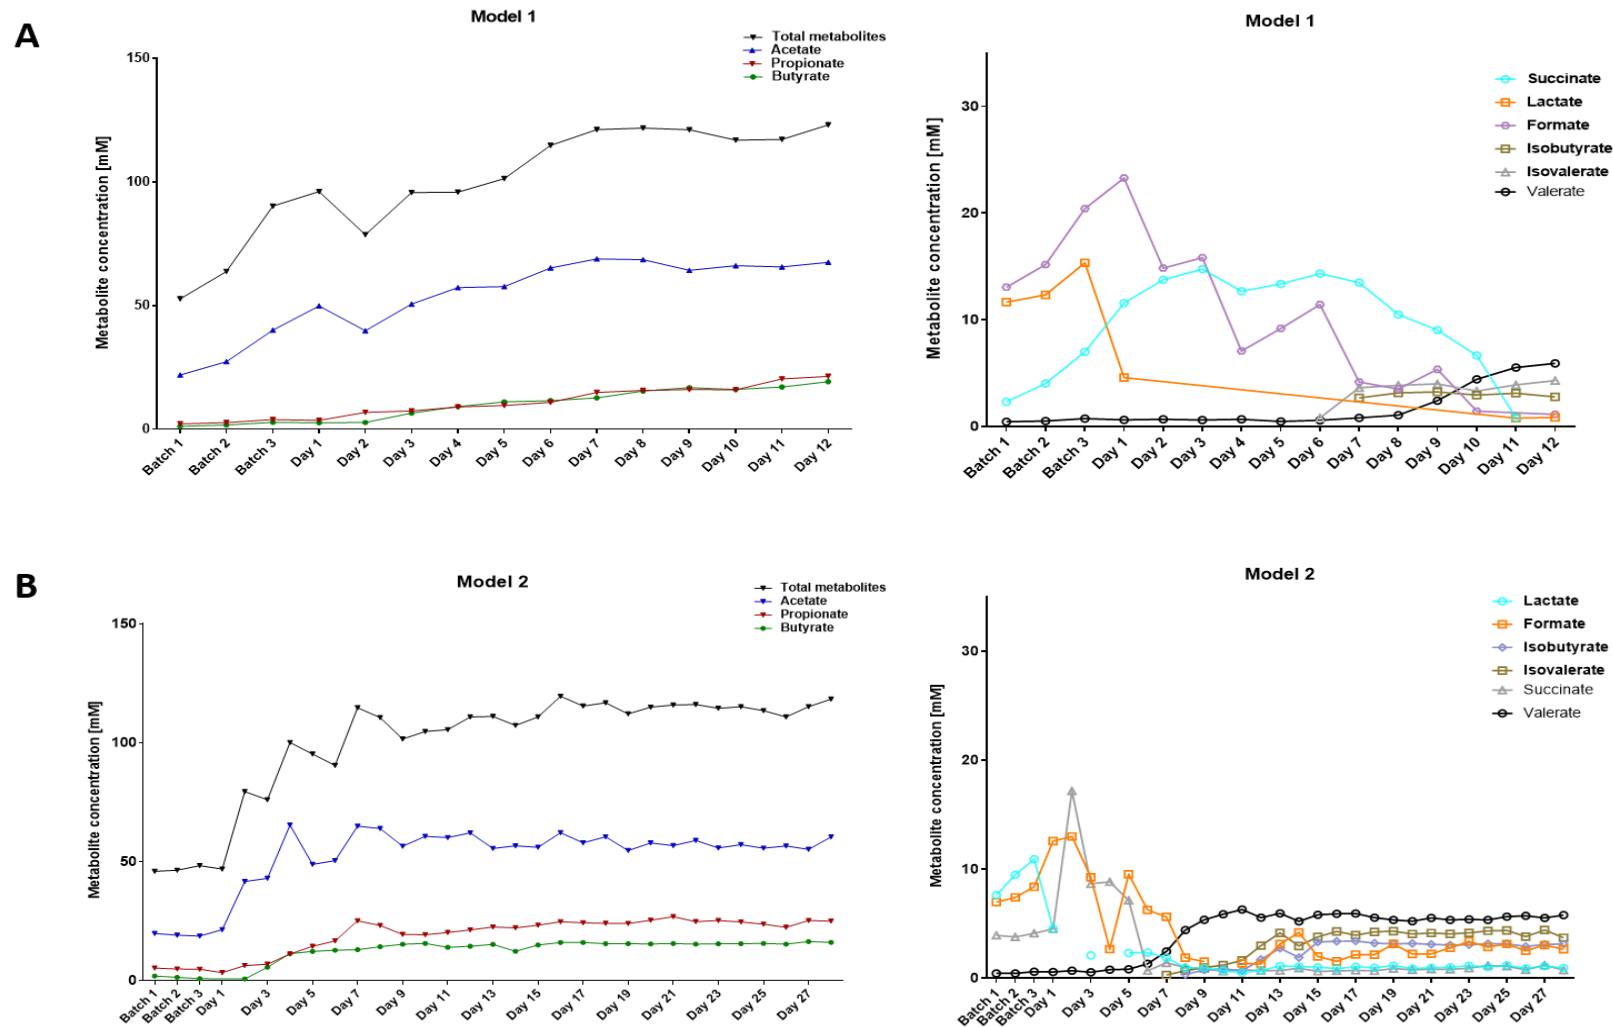

**Supplementary Figure S2:** Daily fermentation metabolite concentrations in reactor effluents of models 1 and 2 (A & B) measured by HPLC. Left the end metabolites (acetate, propionate and butyrate), and right the intermediate metabolites (formate, lactate and succinate) and branched-chain fatty acids (isobutyrate, isovalerate) and valerate. Colonization: three consecutive fed-batch fermentations for bead colonization.

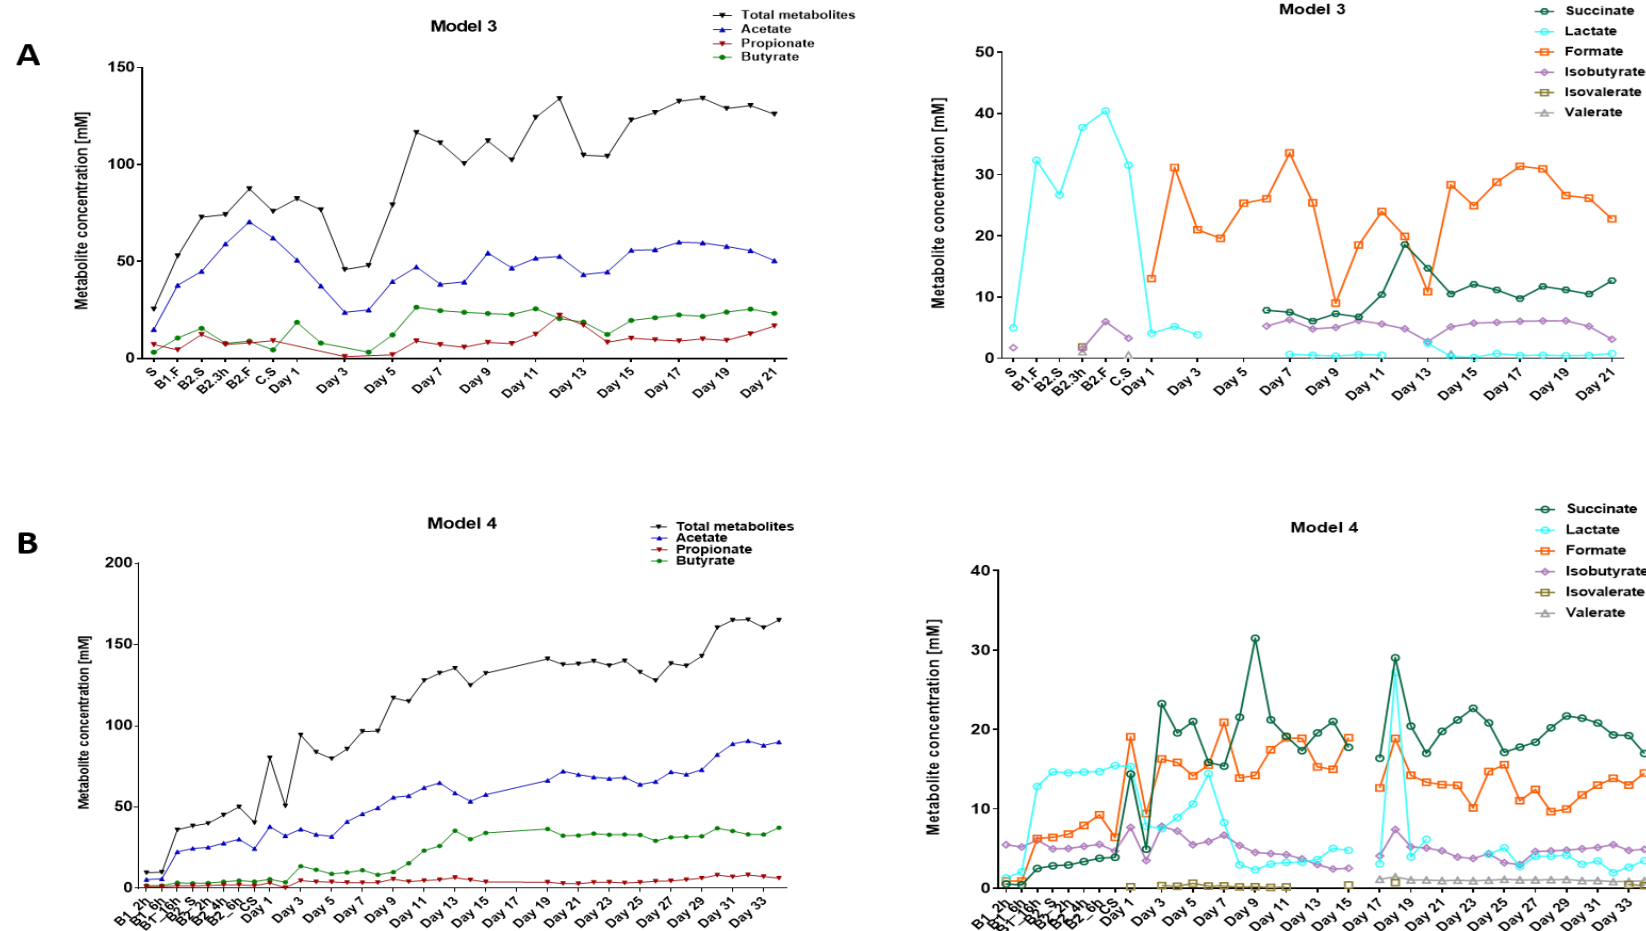

**Supplementary Figure 3:** Daily fermentation metabolite concentrations in reactor effluents of models 3 and 4 (A & B) measured by HPLC. Left the end metabolites (acetate, propionate and butyrate), and right the intermediate metabolites (formate, lactate and succinate) and branched-chain fatty acids (isobutyrate, isovalerate) and valerate. Colonization: three consecutive fed-batch fermentations for bead colonization.

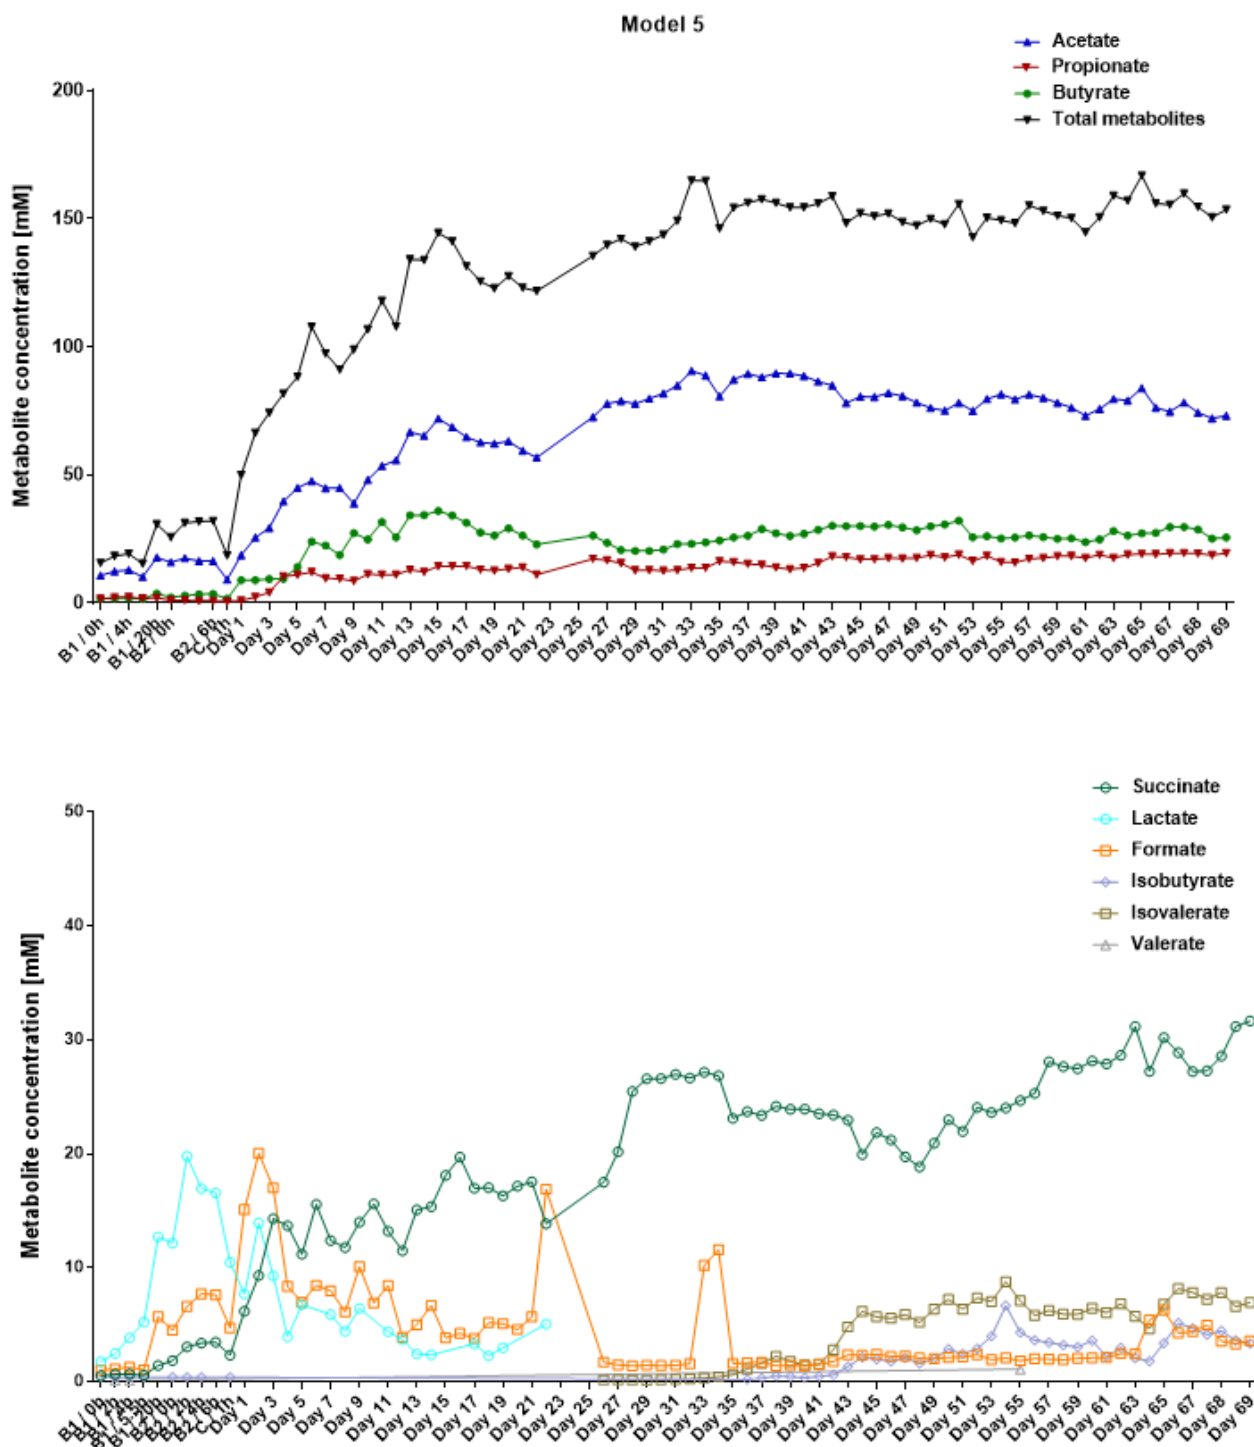

**Supplementary Figure S4:** Daily fermentation metabolite concentrations in reactor effluents of models 5 measured by HPLC. On top the end metabolites (acetate, propionate and butyrate), and below the intermediate metabolites (formate, lactate and succinate) and branched-chain fatty acids (isobutyrate, isovalerate) and valerate. Colonization: three consecutive fed-batch fermentations for bead colonization.

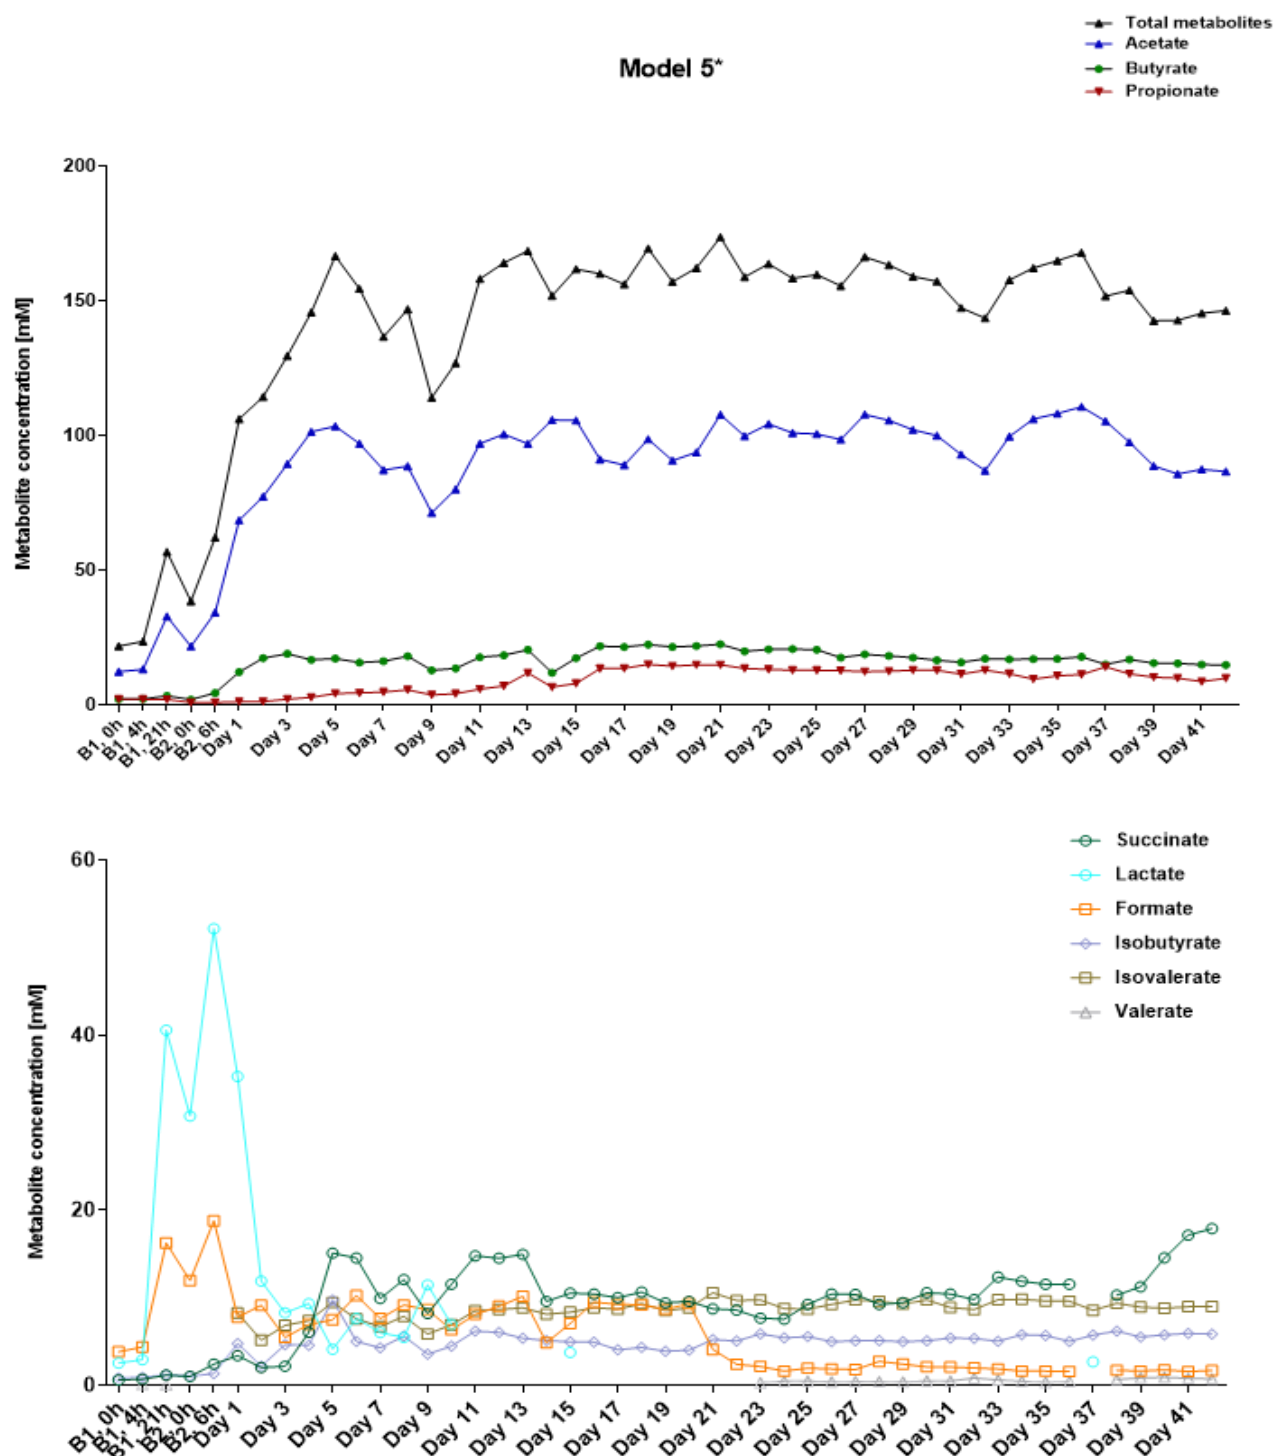

**Supplementary Figure S5:** Daily fermentation metabolite concentrations in reactor effluents of models 5\* measured by HPLC. On top the end metabolites (acetate, propionate and butyrate), and below the intermediate metabolites (formate, lactate and succinate) and branched-chain fatty acids (isobutyrate, isovalerate) and valerate. Colonization: three consecutive fed-batch fermentations for bead colonization.

### Caecal inoculum versus model 5 microbiota

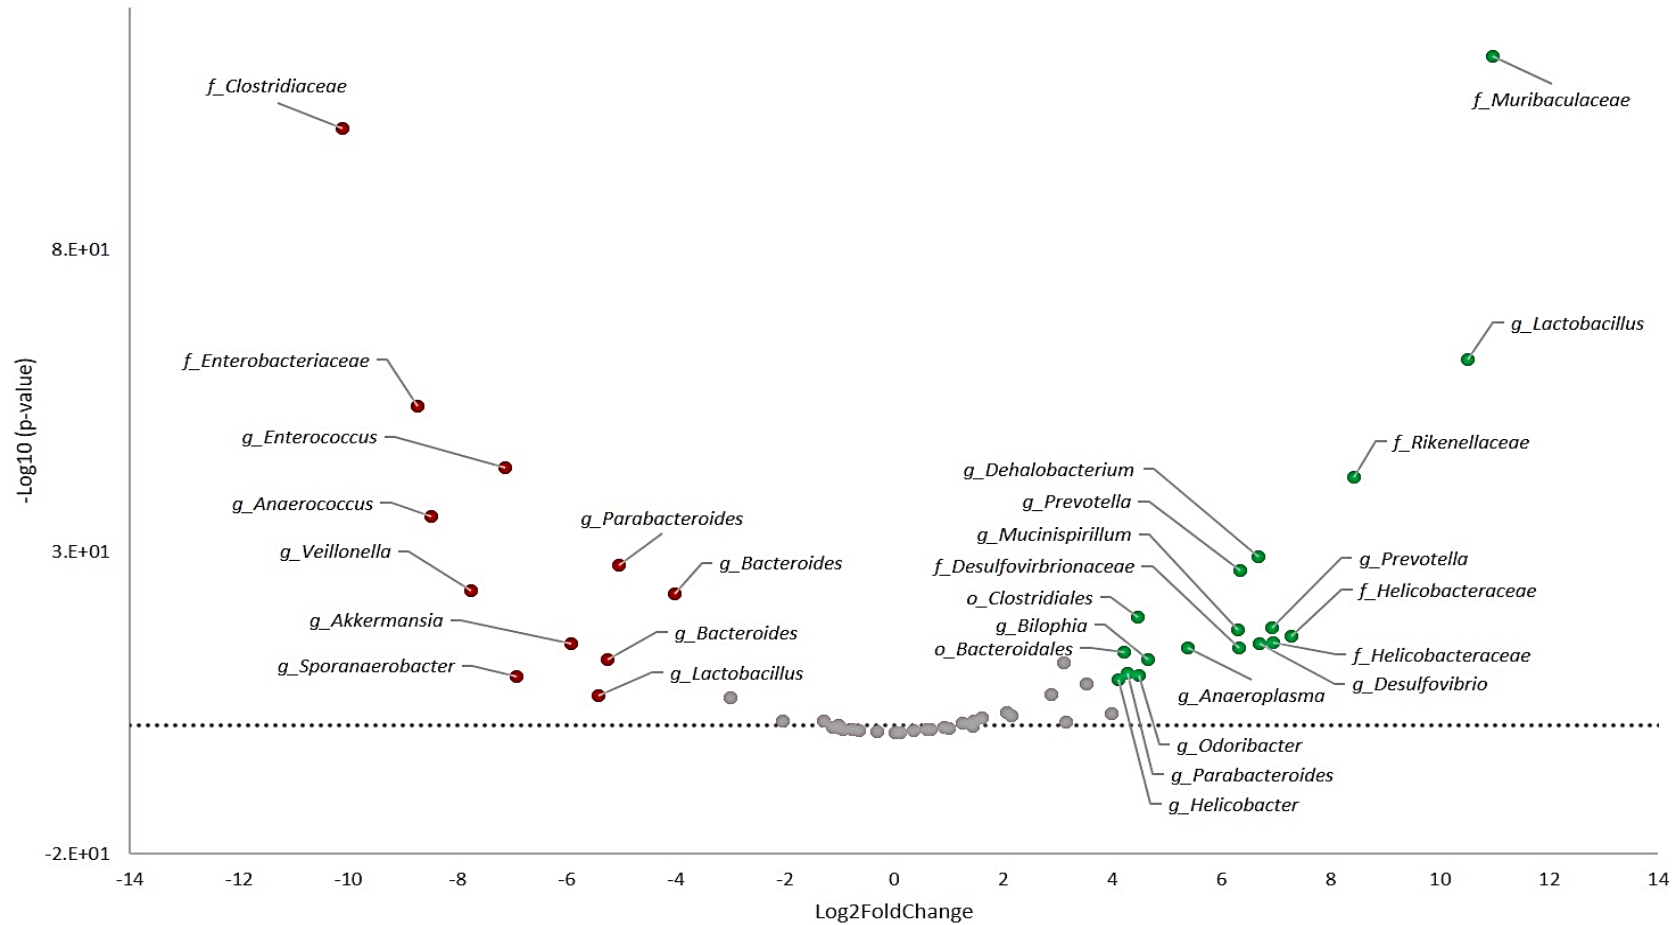

**Supplementary Figure S6:** Microbiota plots illustrating OTUs that were significantly enriched (green) and reduced (red) in reactor effluent of model 5 compared to the caecal inoculum as determined by differential abundance analysis. Each point represents an individual OTU, and the Y-axis indicates the Log2 fold change of relative abundance. The dashed line represents the statistically p-value of 0.05.

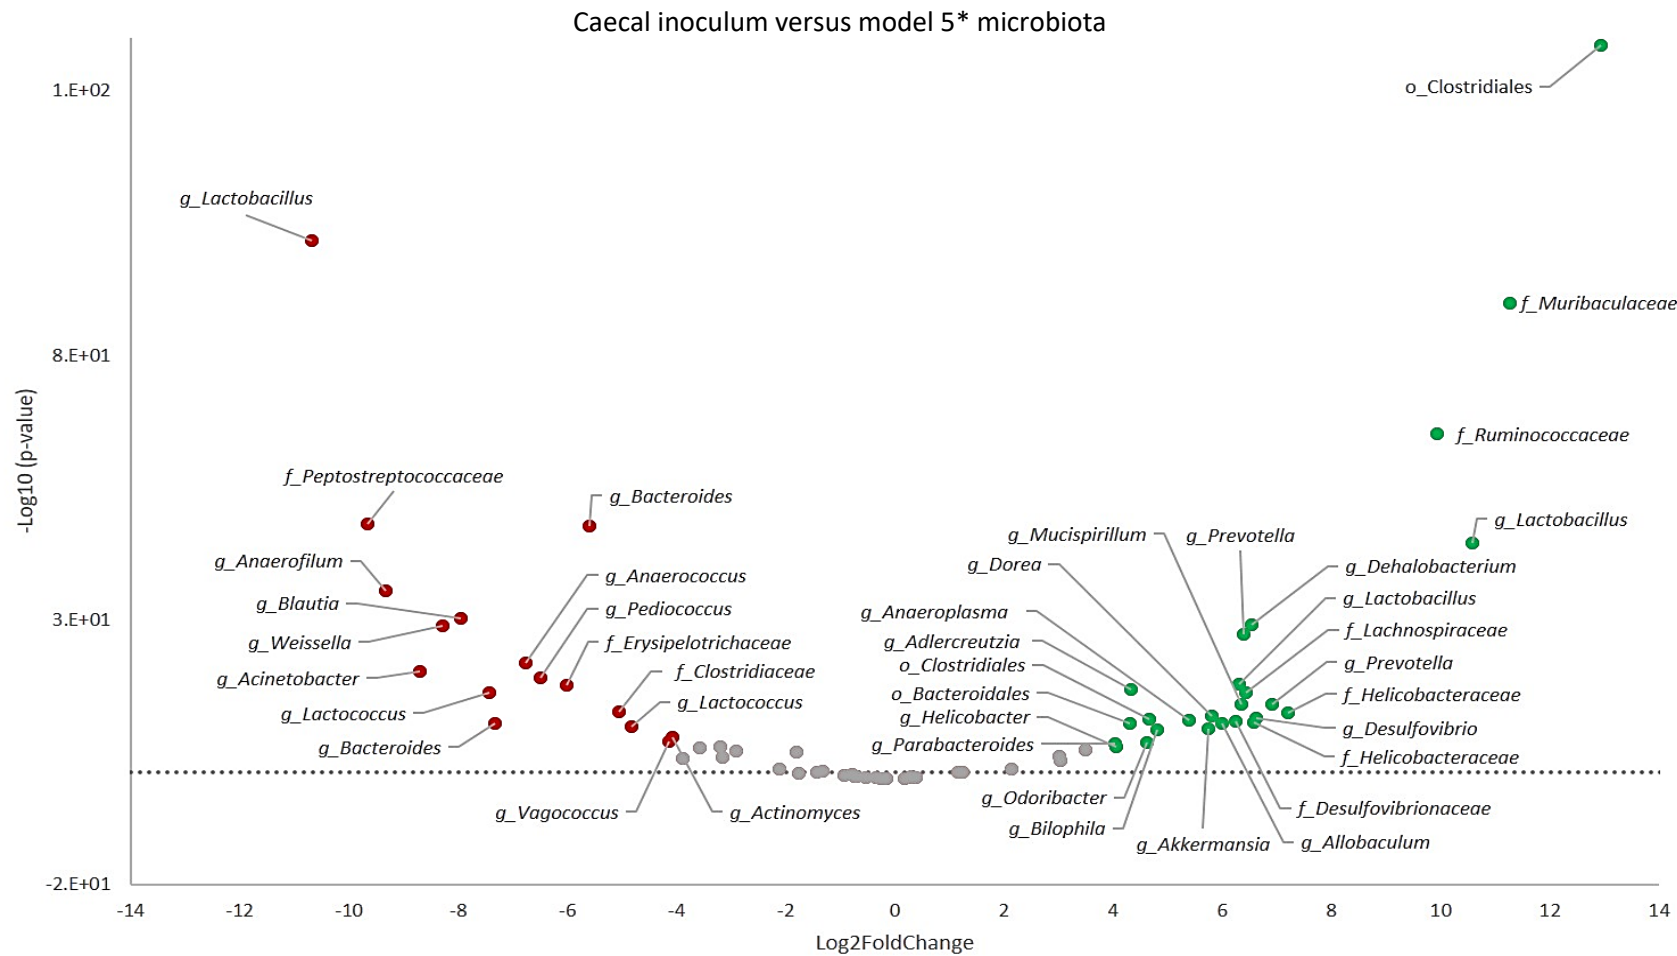

**Supplementary Figure S7:** Microbiota plots illustrating OTUs that were significantly enriched (green) and reduced (red) in reactor effluent of model 5\* compared to the caecal inoculum as determined by differential abundance analysis. Each point represents an individual OTU, and the Y-axis indicates the Log2 fold change of relative abundance. The dashed line represents the statistically p-value of 0.05.



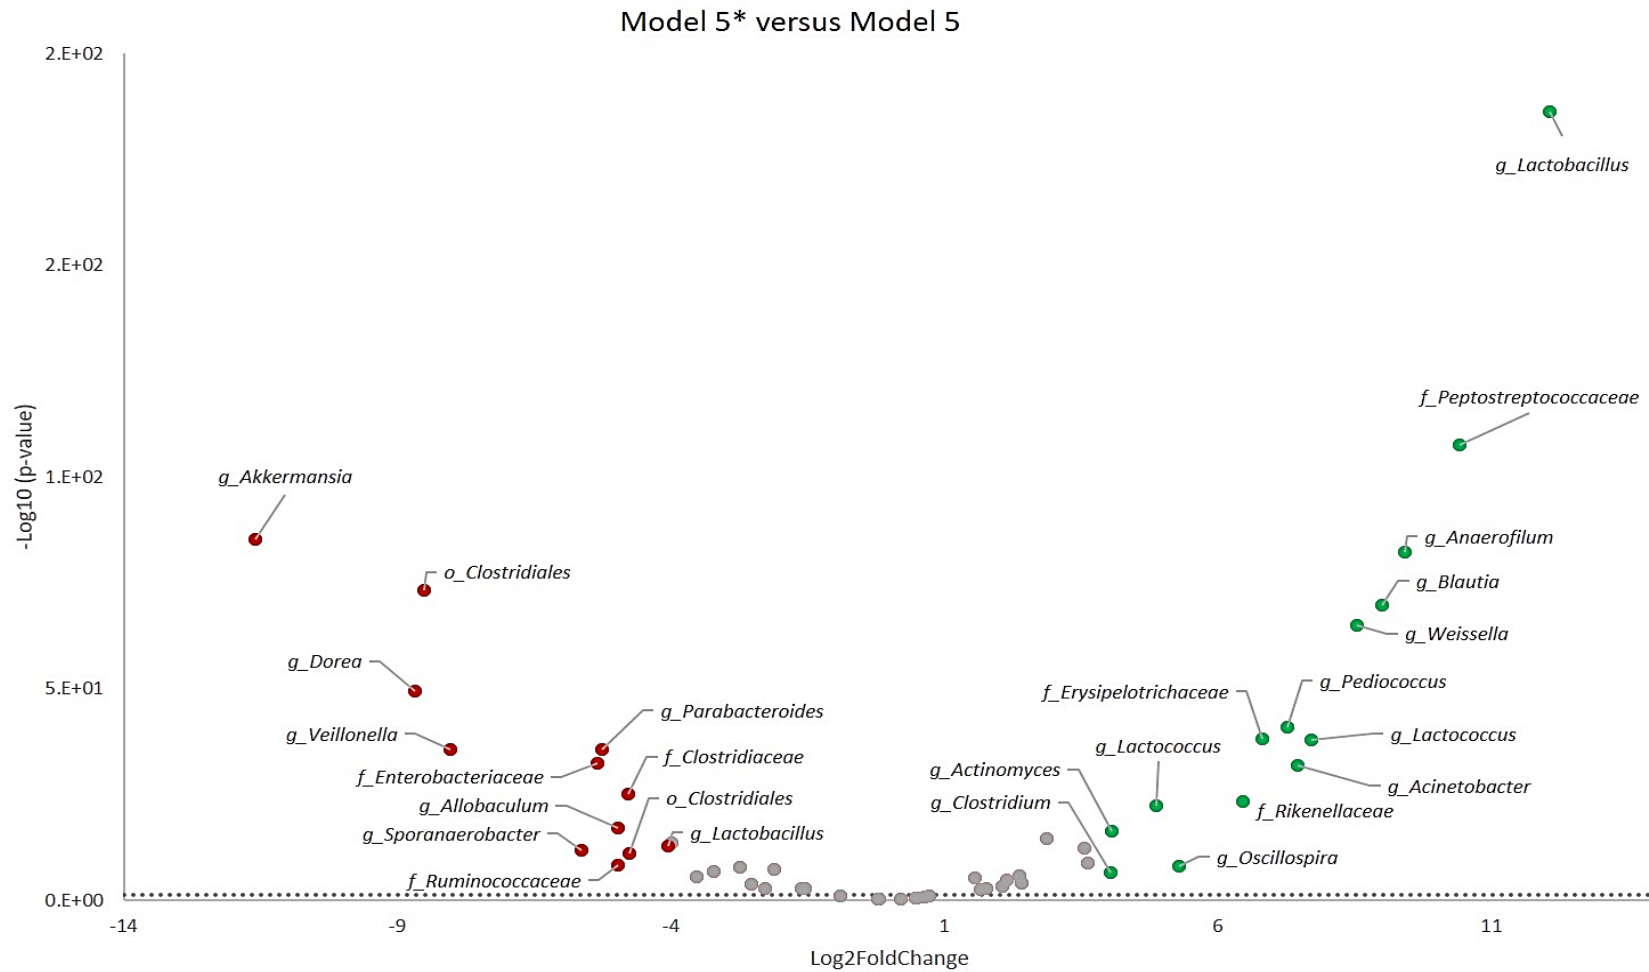

**Supplementary Figure S8:** Microbiota plots illustrating OTUs that were significantly enriched (green) and reduced (red) in reactor effluent of model 5 versus reactor effluent of model 5\* as determined by differential abundance analysis. Each point represents an individual OTU, and the Y-axis indicates the Log2 fold change of relative abundance. The dashed line represents the statistically p-value of 0.05.

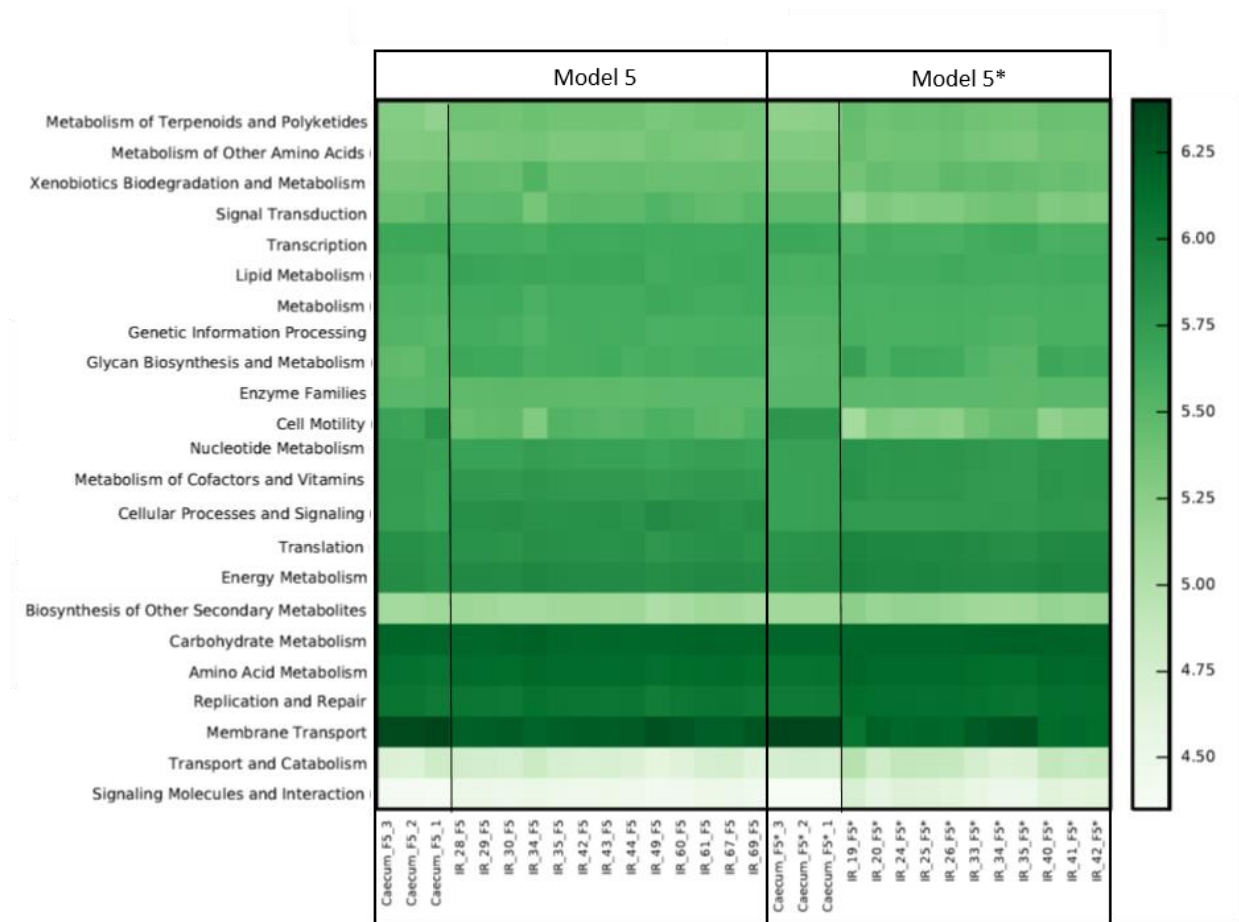

**Supplementary Figure S9:** Predictive functional profiling of microbial communities of caecal inocula and model 5 and model 5\* (during stabilization) by PICRUSt. Heatmap depicting the log transformed gene abundance of microbiota-associated predicted KEGG pathways. Numbers in scale represent log range of gene abundances for this dataset.

**Supplementary Table S1:** Composition of murine nutritive growth medium (g/L) (A) and of three nutritive mouse chows (B).

A

|                                                  | Medium 1 | Medium 2 |
|--------------------------------------------------|----------|----------|
| Constituent                                      | g/l      | g/l      |
| Pectine (citrus)                                 | 2        | 2        |
| Xylane (oat spelts)                              | 4.8      | 4.8      |
| Arabinogalactan (larch wood)                     | 4.8      | 4.8      |
| Soluble starch (corn)                            | 6.8      | 2        |
| Mucine                                           | 4        | 4        |
| Casein acid hydrolysate                          | 3.6      | 3.6      |
| Peptone water                                    | 6        | 6        |
| Bacto™ Tryptone                                  | 6        | 6        |
| Yeast extract                                    | 5.4      | 5.4      |
| L-Cysteine HCl                                   | 0.8      | 0.8      |
| Bile salts (adult formulation: 0.4)              | 0.4      | 0.4      |
| KH <sub>2</sub> PO <sub>4</sub>                  | 0.5      | 0.5      |
| NaHCO <sub>3</sub>                               | 1.5      | 1.5      |
| NaCl                                             | 4.5      | 4.5      |
| KCl                                              | 4.5      | 4.5      |
| MgSO <sub>4</sub> anhydrous (M: 120.37)          | 0.61     | 0.61     |
| CaCl <sub>2</sub> ·2H <sub>2</sub> O (M: 147.02) | 0.1      | 0.1      |
| MnCl <sub>2</sub> ·4H <sub>2</sub> O (M: 197.91) | 0.2      | 0.2      |
| FeSO <sub>4</sub> ·7H <sub>2</sub> O (M: 278.02) | 0.005    | 0.005    |
| Hemin solution                                   | 0.05     | 0.05     |
| Tween 80                                         | 1 ml     | 1 ml     |
| Vitamin solution                                 | 1 ml     | 1 ml     |

B

| KLIBA NAFAG 3430 Mouse and Rat |       |                    |
|--------------------------------|-------|--------------------|
| Carbohydrates                  | 58.7% | approx 68 % fibers |
| Proteins                       | 18.5% |                    |
| Fat/ash                        | 10.8% |                    |

**Supplementary Table S2:** Primers used for the enumeration of specific bacterial populations in caecal and effluent samples by qPCR analysis

| Name         | Sequence 5'-3'                    | Target gene                                                               | Reference                   |
|--------------|-----------------------------------|---------------------------------------------------------------------------|-----------------------------|
| Eub 338F     | ACT CCT ACG GGA GGC AGC AG        | Total bacteria                                                            | Guo et al., 2008            |
| Eub 518R     | ATT ACC GCG GCT GCT GG            |                                                                           |                             |
| Firm 934F    | GGA GYA TGT GGT TTA ATT CGA AGC A | Firmicutes                                                                | Guo et al., 2008            |
| Firm 1060R   | AGC TGA CGA CAA CCA TGC AC        |                                                                           |                             |
| Clep 866mF   | TTA ACA CAA TAA GTW ATC CAC CTG G | <i>Clostridium</i> Cluster IV                                             | Ramirez-Farias et al., 2009 |
| Clep 1240mR  | ACC TTC CTC CGT TTT GTC AAC       |                                                                           |                             |
| Clep 14aF    | AAA TGA CGG TAC CTG ACT AA        | <i>Clostridium</i> Cluster XIVa                                           | Matsuki et al., 2002        |
| Clep 14aR    | CTT TGA GTT TCA TTC TTG CGA A     |                                                                           |                             |
| Bac 303F     | GAA GGT CCC CCA CAT TG            | Bacteroidetes                                                             | Bartosch et al., 2004       |
| Bact Pre-rev | CTT TGA GTT TCA CCG TTG CCG G     |                                                                           |                             |
| Bac 303F     | GAA GGT CCC CCA CAT TG            | <i>Bacteroides</i> spp.                                                   | Ramirez-Farias et al., 2009 |
| Bfr-Femrev   | CGC KAC TTG GCT GGT TCA G         |                                                                           |                             |
| Eco 1457F    | CAT TGA CGT TAC CCG CAG AAG AAG C | <i>Enterobacteriaceae</i>                                                 | Bartosch et al., 2004       |
| Eco 1652R    | CTC TAC GAG ACT CAA GCT TGC       |                                                                           |                             |
| F_Lacto 05   | AGC AGT AGG GAA TCT TCC A         | <i>Lactobacillus</i>  <br><i>Leuconostoc</i>  <br><i>Pediococcus</i> spp. | Furet et al., 2009          |
| R_Lacto 04   | CGC CAC TGG TGT TCY TCC ATA TA    |                                                                           |                             |
| AM1          | CAG CAC GTG AAG GTG GGG AC        | <i>Akkermanisa</i> spp.                                                   | Collado et al., 2007        |
| AM2          | CCT TGC GGT TGG CTT CAG AT        |                                                                           |                             |

**Supplementary Table S3:** Mean metabolite concentrations with standard error of effluent samples in reactor effluents during stabilization phase and caecal contents (n=15).

|                              | Concentrations (mM) |            |            |            |           |           |            |            |                   | Ratios (%) |            |          | Days   |
|------------------------------|---------------------|------------|------------|------------|-----------|-----------|------------|------------|-------------------|------------|------------|----------|--------|
|                              | Formate             | Acetate    | Propionate | Butyrate   | Valerate  | Lactate   | Succinate  | BCFAs      | Total metabolites | Acetate    | Propionate | Butyrate |        |
| Model 1                      |                     |            |            |            |           |           |            |            |                   |            |            |          |        |
| Caecal content <sup>1</sup>  | 3.5                 | 40.2       | 3.9        | 3.6        | ND        | 12.0      | 4.5        | ND         | 55.7              | 83.3       | 8.3        | 8.3      |        |
| IR <sup>2</sup>              | 5.4 ± 3.6           | 64.6 ± 4.3 | 14.9 ± 4.4 | 14.4 ± 3.4 | 2.4 ± 2.3 | 0.8 ± 0.1 | 10.1 ± 4.6 | 4.6 ± 3.3  | 114.8 ± 9.7       | 69.1       | 16.0       | 14.9     | d4-12  |
| Model 2                      |                     |            |            |            |           |           |            |            |                   |            |            |          |        |
| Caecal content <sup>1</sup>  | ND                  | 30.2       | 5.6        | 4.6        | ND        | 22.2      | 8.4        | ND         | 48.8              | 73.2       | 14.6       | 12.2     |        |
| IR <sup>2</sup>              | 2.6 ± 0.7           | 57.6 ± 2.4 | 24.1 ± 1.4 | 15.3 ± 0.9 | 5.8 ± 0.2 | 1.0 ± 0.1 | 0.8 ± 0.2  | 7.0 ± 0.9  | 114.0 ± 3.2       | 60.6       | 24.2       | 15.2     | d12-28 |
| Model 3                      |                     |            |            |            |           |           |            |            |                   |            |            |          |        |
| Caecal content <sup>1</sup>  | ND                  | 59.8       | ND         | 46.7       | ND        | ND        | 28.0       | 0.8        | 88.6              | 56.1       | ND         | 43.9     |        |
| IR <sup>2</sup>              | 17.8 ± 9.0          | 56.5 ± 3.2 | 11.2 ± 2.8 | 22.5 ± 1.9 | ND        | 0.5 ± 0.2 | 11.3 ± 1.0 | 5.5 ± 1.1  | 134.8 ± 4.4       | 62.6       | 12.1       | 25.3     | d15-21 |
| Model 4                      |                     |            |            |            |           |           |            |            |                   |            |            |          |        |
| Caecal content <sup>1</sup>  | ND                  | 73.2       | 15.4       | 82.5       | 0.7       | 1.5       | 9.1        | 152.6      | 335.0             | 42.7       | 8.8        | 48.5     |        |
| IR <sup>2</sup>              | 12.7 ± 1.8          | 74.8 ± 9.6 | 5.1 ± 1.9  | 33.4 ± 2.2 | 1.0 ± 0.0 | 3.8 ± 1.0 | 19.7 ± 1.7 | 2.5 ± 0.4  | 154.3 ± 13.4      | 66.4       | 4.4        | 29.2     | d19-34 |
| Model 5                      |                     |            |            |            |           |           |            |            |                   |            |            |          |        |
| Caecal inoculum <sup>1</sup> | ND                  | 88.0       | 12.8       | 39.9       | 0.8       | 5.2       | 5.3        | ND         | 152.0             | 62.4       | 9.2        | 28.4     |        |
| IR <sup>2</sup>              | 2.7 ± 2.1           | 80.4 ± 5.1 | 16.8 ± 2.1 | 26.6 ± 3.0 | ND        | ND        | 25.1 ± 3.4 | 3.5 ± 2.2  | 158.8 ± 8.9       | 64.5       | 13.7       | 21.8     | d26-69 |
| Model 5*                     |                     |            |            |            |           |           |            |            |                   |            |            |          |        |
| Caecal inoculum <sup>1</sup> | 1.2                 | 33.2       | 5.9        | 11.8       | 0.5       | 3.5       | 6.5        | ND         | 59.1              | 64.7       | 11.8       | 23.5     |        |
| IR <sup>2</sup>              | 3.8 ± 3.1           | 98.5 ± 7.5 | 12.0 ± 1.4 | 18.2 ± 2.7 | ND        | 1.3 ± 0.5 | 10.5 ± 3.1 | 14.4 ± 1.1 | 160.9 ± 7.4       | 76.7       | 9.3        | 14.0     | d13-42 |

<sup>1</sup> extracted from 100 mg of caecal content

<sup>2</sup> Mean and standard error reported over whole stabilized fermentation time

**Supplementary Table S4:** qPCR quantification of bacterial populations in caecal inocula and reactor effluent samples of different models at the end of the stabilization phase.

|                              | Total 16S rRNA gene | Firmicutes | <i>Ruminococcaceae</i> | <i>Lachnospiraceae</i> | Bacteroidetes | Bacteroides spp. | <i>Enterobacteriaceae</i> | <i>Lactobacillus</i> spp. | <i>Akkermansia</i> spp. | Days        |
|------------------------------|---------------------|------------|------------------------|------------------------|---------------|------------------|---------------------------|---------------------------|-------------------------|-------------|
| <b>Model 1</b>               |                     |            |                        |                        |               |                  |                           |                           |                         |             |
| Caecal inoculum <sup>1</sup> | 11.9                | 11.0       | 9.6                    | 9.0                    | 10.9          | 10.4             | 7.7                       | 9.7                       | 4.9                     |             |
| IR <sup>3</sup>              | 10.7                | 9.4        | 8.4                    | 8.4                    | 10.4          | 10.2             | 9.2                       | 7.3                       | 4.6                     | 8           |
| <b>Model 2</b>               |                     |            |                        |                        |               |                  |                           |                           |                         |             |
| Caecal inoculum <sup>1</sup> | 11.8                | 10.8       | 9.2                    | 8.9                    | 11.0          | 10.3             | 8.1                       | 9.5                       | 4.8                     |             |
| IR <sup>4</sup>              | 10.7 ± 0.2          | 9.4 ± 0.2  | 8.6 ± 0.3              | 8.4 ± 0.3              | 10.1 ± 0.4    | 9.0 ± 0.3        | 8.8 ± 0.5                 | 6.4 ± 0.1                 | 4.7 ± 0.1               | 26-28       |
| <b>Model 3</b>               |                     |            |                        |                        |               |                  |                           |                           |                         |             |
| Caecal inoculum <sup>1</sup> | 11.2                | 11.0       | 9.0                    | 10.6                   | 10.3          | 9.9              | 6.2                       | 8.7                       | 5.0                     |             |
| IR <sup>4</sup>              | 11.2 ± 0.3          | 10.8 ± 0.3 | BDL                    | 9.2 ± 0.3              | 10.8 ± 0.2    | 9.8 ± 0.1        | 10.1 ± 0.2                | 6.9 ± 0.4                 | 4.6 ± 0.1               | 17-19       |
| <b>Model 4</b>               |                     |            |                        |                        |               |                  |                           |                           |                         |             |
| Caecal inoculum <sup>1</sup> | 11.6                | 11.4       | 7.8                    | 10.5                   | 10.5          | 9.5              | 6.0                       | 9.3                       | 8.1                     |             |
| IR <sup>4</sup>              | 11 ± 0.1            | 10.3 ± 0.1 | 7.7 ± 0.1              | 9.4 ± 0.3              | 10.0 ± 0.3    | 9.7 ± 0.3        | 9.8 ± 0.7                 | BDL                       | 9.5 ± 0.5               | 27-29       |
| <b>Model 5</b>               |                     |            |                        |                        |               |                  |                           |                           |                         |             |
| Caecal inoculum <sup>2</sup> | 12.1 ± 0.0          | 11.1 ± 0.0 | 8.3 ± 0.0              | 10.1 ± 0.0             | 10.8 ± 0.2    | 7.5 ± 0.3        | 5.7 ± 0.0                 | 8.4 ± 0.1                 | 8.6 ± 0.1               |             |
| IR <sup>4</sup>              | 11.5 ± 0.5          | 10.3 ± 0.1 | 7.1 ± 0.3              | 8.2 ± 0.3              | 10.6 ± 0.2    | 10.0 ± 0.1       | 7.7 ± 0.1                 | 6.6 ± 0.1                 | 8.6 ± 0.4               | 29, 30 & 36 |
| <b>Model 5*</b>              |                     |            |                        |                        |               |                  |                           |                           |                         |             |
| Caecal inoculum <sup>2</sup> | 11.7 ± 0.2          | 11.1 ± 0.2 | 9.1 ± 0.1              | 10.4 ± 0.0             | 10.4 ± 0.2    | 9.3 ± 0.1        | 6.3 ± 0.2                 | 8.2 ± 0.2                 | 6.7 ± 0.1               |             |
| IR <sup>4</sup>              | 11.4 ± 0.1          | 10.4 ± 0.1 | 7.5 ± 0.1              | 8.8 ± 0.2              | 9.7 ± 0.5     | 9.2 ± 0.5        | 6.6 ± 0.3                 | 8.5 ± 0.6                 | 5.7 ± 0.1               | 18-20       |

<sup>1</sup> Data are mean log<sub>10</sub> copies 16S rRNA gene g<sup>-1</sup> of caecal inoculum used for fermentation

<sup>2</sup> Data are mean log<sub>10</sub> copies 16S rRNA gene g<sup>-1</sup> ± SD of caecal inoculum (extracted twice) used for fermentation

<sup>3</sup> Data are mean log<sub>10</sub> copies 16S rRNA gene mL<sup>-1</sup> of one day at the end of the stabilization period

<sup>4</sup> Data are mean log<sub>10</sub> copies 16S rRNA gene mL<sup>-1</sup> ± SD of one day at the end of the stabilization period extracted in duplicate; samples were analyzed in duplicate

BDL of 4.0 log<sub>10</sub> copies per mL

**Supplementary Table S5** – Summary microbial phyla and most abundant (> 1 %) bacterial families obtained by V4 region 16S amplicon sequencing within PolyFermS reactors of model 5 and 5\*. Values < 1 % are summarized in the group «Others».

| Taxon                        | Caecal inoculum 5   | IR Model 5          | Caecal inoculum 5*  | IR Model 5*          |
|------------------------------|---------------------|---------------------|---------------------|----------------------|
| <b>Actinobacteria</b>        | <b>0.7% ± 0.5%</b>  | <b>0.1% ± 0.1%</b>  | <b>0.3% ± 0.1%</b>  | <b>0.4% ± 0.9%</b>   |
| <i>Actinomycetaceae</i>      | 0.0% ± 0.0%         | 0.0% ± 0.0%         | 0.0% ± 0.0%         | 0.3% ± 0.7%          |
| <i>Microbacteriaceae</i>     | 0.0% ± 0.0%         | 0.0% ± 0.0%         | 0.0% ± 0.0%         | 0.0% ± 0.0%          |
| <i>Bifidobacteriaceae</i>    | 0.3% ± 0.6%         | 0.0% ± 0.0%         | 0.1% ± 0.0%         | 0.1% ± 0.1%          |
| <i>Coriobacteriaceae</i>     | 0.4% ± 0.1%         | 0.1% ± 0.1%         | 0.3% ± 0.0%         | 0.1% ± 0.1%          |
| <b>Bacteroidetes</b>         | <b>11.1% ± 3.1%</b> | <b>29.1% ± 6.4%</b> | <b>9.1% ± 1.7%</b>  | <b>64.7% ± 14.2%</b> |
| UC Bacteroidales             | 0.1% ± 0.1%         | 0.0% ± 0.0%         | 0.0% ± 0.0%         | 0.0% ± 0.0%          |
| <i>Bacteroidaceae</i>        | 0.9% ± 0.5%         | 24.4% ± 7.3%        | 2.6% ± 0.5%         | 64.3% ± 14.3%        |
| <i>Porphyromonadaceae</i>    | 0.0% ± 0.0%         | 4.7% ± 2.1%         | 0.4% ± 0.2%         | 0.2% ± 0.1%          |
| <i>Prevotellaceae</i>        | 0.2% ± 0.2%         | 0.0% ± 0.0%         | 0.2% ± 0.1%         | 0.0% ± 0.0%          |
| <i>Rikenellaceae</i>         | 1.4% ± 0.4%         | 0.0% ± 0.0%         | 0.6% ± 0.7%         | 0.2% ± 0.2%          |
| <i>Muribaculaceae</i>        | 8.2% ± 2.1%         | 0.0% ± 0.0%         | 4.7% ± 1.0%         | 0.0% ± 0.0%          |
| <i>Odoribacteraceae</i>      | 0.1% ± 0.1%         | 0.0% ± 0.0%         | 0.0% ± 0.0%         | 0.0% ± 0.0%          |
| <i>Paraprevotellaceae</i>    | 0.1% ± 0.1%         | 0.0% ± 0.0%         | 0.6% ± 0.4%         | 0.0% ± 0.0%          |
| <i>Deferribacteraceae</i>    | 0.1% ± 0.1%         | 0.0% ± 0.0%         | 0.3% ± 0.3%         | 0.0% ± 0.0%          |
| <b>Firmicutes</b>            | <b>86.9% ± 3.3%</b> | <b>40.0% ± 7.5%</b> | <b>86.7% ± 4.0%</b> | <b>31.8% ± 12.5%</b> |
| <i>Planococcaceae</i>        | 0.0% ± 0.0%         | 0.0% ± 0.0%         | 0.0% ± 0.0%         | 0.1% ± 0.2%          |
| <i>Enterococcaceae</i>       | 0.0% ± 0.0%         | 0.8% ± 0.3%         | 0.0% ± 0.0%         | 0.1% ± 0.1%          |
| <i>Lactobacillaceae</i>      | 5.6% ± 5.9%         | 0.2% ± 0.2%         | 2.0% ± 0.8%         | 11.5% ± 4.8%         |
| <i>Leuconostocaceae</i>      | 0.0% ± 0.0%         | 0.0% ± 0.0%         | 0.0% ± 0.0%         | 0.8% ± 0.5%          |
| <i>Streptococcaceae</i>      | 0.0% ± 0.0%         | 0.0% ± 0.0%         | 0.0% ± 0.0%         | 0.4% ± 0.5%          |
| UC Clostridiales             | 57.8% ± 10.9%       | 2.0% ± 1.3%         | 62.1% ± 4.6%        | 0.0% ± 0.0%          |
| <i>Clostridiaceae</i>        | 0.1% ± 0.0%         | 28.7% ± 8.0%        | 0.0% ± 0.0%         | 0.9% ± 0.8%          |
| <i>Dehalobacteriaceae</i>    | 0.4% ± 0.3%         | 0.0% ± 0.0%         | 0.2% ± 0.1%         | 0.0% ± 0.0%          |
| <i>Eubacteriaceae</i>        | 0.0% ± 0.0%         | 0.0% ± 0.0%         | 0.0% ± 0.0%         | 0.0% ± 0.0%          |
| <i>Lachnospiraceae</i>       | 19.6% ± 12.4%       | 3.6% ± 1.3%         | 13.7% ± 1.2%        | 8.5% ± 5.3%          |
| <i>Peptostreptococcaceae</i> | 0.0% ± 0.0%         | 0.0% ± 0.0%         | 0.0% ± 0.0%         | 3.3% ± 2.2%          |
| <i>Ruminococcaceae</i>       | 3.3% ± 0.9%         | 1.4% ± 0.7%         | 6.4% ± 1.5%         | 5.5% ± 3.1%          |
| <i>Veillonellaceae</i>       | 0.0% ± 0.0%         | 0.8% ± 0.5%         | 0.0% ± 0.0%         | 0.0% ± 0.0%          |
| <i>Mogibacteriaceae</i>      | 0.1% ± 0.0%         | 0.0% ± 0.0%         | 0.0% ± 0.0%         | 0.0% ± 0.0%          |
| <i>Tissierellaceae</i>       | 0.0% ± 0.0%         | 2.0% ± 1.1%         | 0.0% ± 0.0%         | 0.4% ± 0.4%          |
| <i>Erysipelotrichaceae</i>   | 0.1% ± 0.1%         | 0.6% ± 0.4%         | 2.2% ± 0.6%         | 0.3% ± 0.2%          |
| <b>Proteobacteria</b>        | <b>0.2% ± 0.0%</b>  | <b>10.5% ± 6.7%</b> | <b>3.5% ± 1.9%</b>  | <b>3.1% ± 2.0%</b>   |
| <i>Alcaligenaceae</i>        | 0.1% ± 0.0%         | 0.5% ± 0.6%         | 0.5% ± 0.3%         | 1.8% ± 1.3%          |
| <i>Desulfovibrionaceae</i>   | 0.1% ± 0.0%         | 0.0% ± 0.0%         | 1.1% ± 0.3%         | 0.0% ± 0.0%          |
| <i>Helicobacteraceae</i>     | 0.0% ± 0.0%         | 0.0% ± 0.0%         | 1.8% ± 1.4%         | 0.0% ± 0.0%          |
| <i>Enterobacteriaceae</i>    | 0.0% ± 0.0%         | 10.0% ± 6.6%        | 0.0% ± 0.0%         | 0.3% ± 0.3%          |
| <i>Moraxellaceae</i>         | 0.0% ± 0.0%         | 0.0% ± 0.0%         | 0.0% ± 0.0%         | 1.1% ± 1.5%          |
| <b>Verrucomicrobia</b>       | <b>0.8% ± 0.7%</b>  | <b>20.3% ± 7.8%</b> | <b>0.0% ± 0.0%</b>  | <b>0.0% ± 0.0%</b>   |
| <i>Verrucomicrobiaceae</i>   | 0.8% ± 0.7%         | 20.3% ± 7.8%        | 0.0% ± 0.0%         | 0.0% ± 0.0%          |

## References

- Bartosch S, Fite A, Macfarlane GT, McMurdo ME. (2004). Characterization of bacterial communities in feces from healthy elderly volunteers and hospitalized elderly patients by using real-time PCR and effects of antibiotic treatment on the fecal microbiota. *Appl Environ Microbiol* **70**: 3575-3581.
- Collado MC, Calabuig M, Sanz Y. (2007). Differences between the fecal microbiota of coeliac infants and healthy controls. *Curr Issues Intest Microbiol* **8**: 9-14.
- Furet JP, Firmesse O, Gourmelon M, Bridonneau C, Tap J, Mondot S *et al.* (2009). Comparative assessment of human and farm animal faecal microbiota using real-time quantitative PCR. *FEMS Microbiol Ecol* **68**: 351-362.
- Guo X, Xia X, Tang R, Zhou J, Zhao H, Wang K. (2008). Development of a real-time PCR method for Firmicutes and Bacteroidetes in faeces and its application to quantify intestinal population of obese and lean pigs. *Lett Appl Microbiol* **47**: 367-373.
- Matsuki, T., et al., Development of 16S rRNA-gene-targeted group-specific primers for the detection and identification of predominant bacteria in human feces. *Applied and environmental microbiology*, 2002. **68**(11): p. 5445-5451.
- Ramirez-Farias C, Slezak K, Fuller Z, Duncan A, Holtrop G, Louis P. (2009). Effect of inulin on the human gut microbiota: stimulation of *Bifidobacterium adolescentis* and *Faecalibacterium prausnitzii*. *Brit J Nutr* **101**: 541-550.
